# Supplementary material for: Risks and benefits of percutaneous coronary intervention in spontaneous coronary artery dissection
Source: PubMed Central journal article supplement (PMC8372386; doi:10.1136/heartjnl-2020-318914), 2021-05-18
Supplement: heartjnl-2020-318914supp001.pdf [file heartjnl-2020-318914supp001.pdf]

## Supplemental Material

### Risks and benefits of Percutaneous Coronary Intervention in Spontaneous Coronary Artery Dissection

Deevia Kotecha MBBS<sup>1\*</sup>, Marcos Garcia-Guimaraes MD<sup>1,2, 3\*</sup>, Diluka Premawardhana MBBS<sup>1\*</sup>, Dario Pellegrini MD<sup>4,5</sup>, Clare Oliver-Williams PhD<sup>1</sup>, Vasiliki Boutziouka PhD<sup>1</sup>, Alice Wood MBBS<sup>1</sup>, Nalin Natarajan MBBS<sup>1</sup>, Robert Jackson MBBS<sup>1</sup>, Nathan Chan MBBS<sup>1</sup>, Jan Ziaullah MBBS<sup>1</sup>, Roby Rakhit MD<sup>6</sup>, Stephen P Hoole MD<sup>7</sup>, Thomas W Johnson PhD<sup>8</sup>, Jacek Kadziela MD<sup>9</sup>, Peter Ludman MD<sup>10</sup>, Nilesh J. Samani MD<sup>1</sup>, Angela H.E.M. Maas MD<sup>4</sup>, Robert Jan Van Geuns MD<sup>4\*\*</sup>, Fernando Alfonso MD<sup>2\*\*</sup> and David Adlam DPhil<sup>1\*\*</sup>

\*Joint first authors, \*\*Joint senior authors

<sup>1</sup> Department of Cardiovascular Sciences, and NIHR Leicester Biomedical Research Centre, Leicester, UK

<sup>2</sup> Department of Cardiology, Hospital Universitario de La Princesa, Madrid, Spain

<sup>3</sup> Department of Cardiology, Hospital del Mar, Barcelona, Spain

<sup>4</sup> Radboud University Medical Center, Department of Cardiology, Nijmegen, The Netherlands

<sup>5</sup> ASST Papa Giovanni XXIII, Bergamo, Italy

<sup>6</sup> Royal Free Hospital, London, UK

<sup>7</sup> Royal Papworth Hospital and NIHR Cambridge Biomedical Research Centre, Cambridge, UK

<sup>8</sup> Bristol Heart Institute, University Hospitals Bristol & Weston NHS Foundation Trust, Bristol, UK

<sup>9</sup> Department of Interventional Cardiology and Angiology, National Institute of Cardiology, Warsaw, Poland

<sup>10</sup> Institute of Cardiovascular Sciences, University of Birmingham, UK

## **SUPPLEMENTARY METHODS**

### **The UK, Dutch and Spanish SCAD registries**

The UK, Dutch and Spanish SCAD registries are national observational registries which have been previously described<sup>1-3</sup>. Each was established independently but under the leadership of the European Society of Cardiology Acute Cardiovascular Care Association SCAD Study Group the registries have been working together to increase the power of observational analyses which can be substantially enhanced in this way. All registries accept referrals of SCAD patients from clinicians and additionally patients can self-refer to the UK registry via a web recruitment portal. As these are consented registries, all patients included are inherently survivors of SCAD with most patients consented after hospital discharge. The registries collect parallel data on patient demographics, past medical history and details of the SCAD presentation. Imaging data collected include the index angiogram and imaging conducted to assess for extra-coronary arteriopathies and at the time of recurrent AMI.

### **Angiographic analysis**

Angiographic analysis was conducted using Medis® Suite software with 3-dimensional quantitative angiography undertaken using Q Angio XA 3D software. Initial analysis was conducted to assess the vessel location, AHA coronary segments<sup>4</sup> and a modified Yip-Saw classification for the SCAD location.<sup>5</sup> Multi-vessel disease was defined as discontinuous SCAD locations affecting more than one coronary territory. Multi-segment disease was defined as a single dissection site affecting more than one AHA coronary segment. Proximal disease was defined as dissections involving at least one of AHA coronary segments 1, 5, 6, or 11. 3D QCA analysis was restricted to cases where valid measurement could be made.

Patients with TIMI 0 flow beyond the lesion were excluded. Stent displaced haematoma volume was estimated from the Q Angio XA 3D QCA function<sup>6</sup> which enables estimation of atherosclerotic plaque volume (here interpreted as haematoma volume) by subtracting measured lumen volume from a predicted 'normal' lumen volume based on projected vessel boundaries from the 3D vessel reconstruction. The estimated stent displaced volume was then calculated as:

$$\text{Displaced haematoma volume} = \frac{(\text{Haematoma volume} \times \text{Stent Length})}{\text{Lesion Length}}$$

## . References

1. Al-Hussaini A, Abdelaty A, Gulsin GS, Arnold JR, Garcia-Guimaraes M, Premawardhana D, Budgeon C, Wood A, Natarajan N, Mangion K, Rakhit R, Hoole SP, Johnson TW, Berry C, Hudson I, Gershlick AH, Ladwiniec A, Kovac J, Squire I, Samani NJ, Plein S, McCann GP and Adlam D. Chronic infarct size after spontaneous coronary artery dissection: implications for pathophysiology and clinical management. *Eur Heart J*. 2020.
2. Diez-Villanueva P, Garcia-Guimaraes MM, Macaya F, Masotti M, Nogales JM, Jimenez-Kockar M, Velazquez M, Lozano I, Moreu J, Avanzas P, Salamanca J and Alfonso F. Spontaneous Coronary Artery Dissection and Menopause. *Am J Cardiol*. 2021.
3. Smaardijk VR, Mommersteeg PMC, Kop WJ, Pellegrini D, van Geuns RJ and Maas A. Psychological and clinical characteristics of patients with spontaneous coronary artery dissection: A case-control study. *International journal of cardiology*. 2021;323:1-6.
4. Austen WG, Edwards JE, Frye RL, Gensini GG, Gott VL, Griffith LS, McGoon DC, Murphy ML and Roe BB. A reporting system on patients evaluated for coronary artery disease. Report of the Ad Hoc Committee for Grading of Coronary Artery Disease, Council on Cardiovascular Surgery, American Heart Association. *Circulation*. 1975;51:5-40.
5. Yip A and Saw J. Spontaneous coronary artery dissection-A review. *Cardiovascular diagnosis and therapy*. 2015;5:37-48.
6. Kishi S, Magalhaes TA, Cerci RJ, Zimmermann E, Matheson MB, Vavere A, Tanami Y, Kitslaar PH, George RT, Brinker J, Miller JM, Clouse ME, Lemos PA, Niinuma H, Reiber JHC, Kofoed KF, Rochitte CE, Rybicki FJ, Di Carli MF, Cox C, Lima JAC and Arbab-Zadeh A. Comparative effectiveness of coronary artery stenosis and atherosclerotic plaque burden assessment for predicting 30-day revascularization and 2-year major adverse cardiac events. *Int J Cardiovasc Imaging*. 2020.

**eTable 1:** Association between patient, clinical and intervention characteristics and risk of serious complications in a SCAD cohort

|                                                        | n                        | Unadjusted         |                   | Age, sex and ethnicity adjusted* |                    |                   |       |
|--------------------------------------------------------|--------------------------|--------------------|-------------------|----------------------------------|--------------------|-------------------|-------|
|                                                        |                          | OR (95% CI)        | P                 | n                                | OR (95% CI)        | P                 |       |
| <b>Patient Characteristics</b>                         |                          |                    |                   |                                  |                    |                   |       |
| Age at first SCAD event, per year                      | 215                      | 0.98 (0.94; 1.03)  | 0.474             | n/a                              | n/a                | n/a               |       |
| Ethnicity (White European vs non-White European)       | 213                      | 0.63 (0.17; 2.37)  | 0.494             | n/a                              | n/a                | n/a               |       |
| Male vs Female                                         | 215                      | 0.59 (0.07; 4.78)  | 0.623             | n/a                              | n/a                | n/a               |       |
| Pregnant female vs Non-pregnant female                 | 203                      | 1.33 (0.27; 6.42)  | 0.724             | 201                              | 1.08 (0.19; 6.12)  | 0.933             |       |
| Grading of tortuosity for all vessels imaged, per unit | 214                      | 0.96 (0.81; 1.15)  | 0.698             | 213                              | 0.96 (0.80; 1.15)  | 0.676             |       |
| <b>Clinical Characteristics</b>                        |                          |                    |                   |                                  |                    |                   |       |
| Type of myocardial infarction                          | STEMI vs NSTEMI          | 215                | 0.83 (0.36; 1.91) | 0.655                            | 213                | 0.80 (0.34; 1.85) | 0.599 |
|                                                        | Cardiac arrest vs NSTEMI |                    | 0.57 (0.12; 2.80) | 0.492                            |                    | 0.57 (0.12; 2.87) | 0.499 |
| Left main stem vessel affected                         | 215                      | 2.95 (0.86; 10.15) | 0.086             | 213                              | 2.84 (0.78; 10.36) | 0.114             |       |
| Left anterior descending artery affected               | 215                      | 0.55 (0.24; 1.25)  | 0.154             | 213                              | 0.49 (0.21; 1.16)  | 0.106             |       |
| Left circumflex artery affected                        | 215                      | 1.80 (0.75; 4.28)  | 0.185             | 213                              | 1.88 (0.78; 4.53)  | 0.158             |       |
| Right coronary artery affected                         | 215                      | 1.94 (0.71; 5.30)  | 0.194             | 213                              | 2.02 (0.73; 5.61)  | 0.176             |       |
|                                                        | Mid vs proximal          | 215                | 0.53 (0.22; 1.28) | 0.156                            | 213                | 0.52 (0.21; 1.30) | 0.160 |

|                                                        |                    |     |                    |        |     |                    |        |
|--------------------------------------------------------|--------------------|-----|--------------------|--------|-----|--------------------|--------|
| AHA coronary segment                                   | Distal vs proximal |     | -                  | -      |     | -                  | -      |
| involved                                               | Branch vs proximal |     | 0.60 (0.18; 2.00)  | 0.402  |     | 0.59 (0.17; 2.09)  | 0.415  |
| More than one vessel involved                          |                    | 215 | 2.68 (0.89; 8.15)  | 0.081  | 213 | 2.84 (0.92; 8.80)  | 0.070  |
| More than one segment within the vessel involved       |                    | 215 | 2.38 (1.07; 5.35)  | 0.034  | 213 | 2.38 (1.04; 5.42)  | 0.038  |
| Yip-Saw Classification based on appearance when imaged | Type 2 vs Type 1   | 215 | 1.66 (0.46; 6.04)  | 0.442  | 213 | 1.66 (0.45; 6.07)  | 0.447  |
|                                                        | Type 3 vs Type 1   |     | 2.09 (0.36; 12.08) | 0.410  |     | 1.93 (0.33; 11.27) | 0.463  |
|                                                        | Type 4 vs Type 1   |     | 0.14 (0.01; 1.39)  | 0.092  |     | 0.14 (0.01; 1.40)  | 0.093  |
| <b>Intervention Details</b>                            |                    |     |                    |        |     |                    |        |
| Type of intervention                                   | Balloon vs stent   | 215 | 0.11 (0.01; 0.86)  | 0.035  | 213 | 0.11 (0.01; 0.86)  | 0.035  |
|                                                        | Wiring vs stent    |     | 0.38 (0.05; 3.07)  | 0.367  |     | 0.38 (0.05; 3.03)  | 0.358  |
| Maximum stent diameter, per mm                         |                    | 141 | 5.40 (2.34; 12.50) | <0.001 | 140 | 5.42 (2.29; 12.79) | <0.001 |
| Total number of stents, per additional stent           |                    | 155 | 1.63 (1.21; 2.21)  | 0.002  | 154 | 1.68 (1.22; 2.30)  | 0.001  |
| Total length of stents, per mm                         |                    | 142 | 1.02 (1.00; 1.03)  | 0.020  | 141 | 1.02 (1.00; 1.03)  | 0.014  |
| Proximal diameter, per mm                              |                    | 168 | 0.96 (0.49; 1.88)  | 0.898  | 166 | 0.94 (0.46; 1.89)  | 0.853  |
| Length of lesion, per mm                               |                    | 141 | 1.01 (0.99; 1.03)  | 0.488  | 139 | 1.01 (0.99; 1.03)  | 0.487  |
| Volume of haematoma, per mm <sup>3</sup>               |                    | 136 | 1.00 (0.99; 1.01)  | 0.644  | 135 | 1.00 (0.99; 1.01)  | 0.645  |
| TIMI flow                                              | 1 vs 0 (No flow)   | 215 | 0.96 (0.13; 6.98)  | 0.970  | 213 | 0.92 (0.12; 6.74)  | 0.933  |

|                              |                   |       |                   |       |
|------------------------------|-------------------|-------|-------------------|-------|
| 2 vs 0 (No flow)             | 1.90 (0.41; 8.82) | 0.415 | 1.75 (0.37-8.27)  | 0.478 |
| 3 (Good flow) vs 0 (No flow) | 0.47 (0.12; 1.81) | 0.269 | 0.44 (0.11; 1.73) | 0.237 |

\* Each patient characteristic, clinical characteristic and intervention factor was included separately in a model adjusting for age, sex and ethnicity

*ACE - Angiotensin-converting enzyme; ARB - Angiotensin II Receptor Blockers; DAPT – dual antiplatelet therapy; NSTEMI – Non-ST-Elevation Myocardial Infarction; SCAD - Spontaneous Coronary Artery Dissection; STEMI - ST-Elevation Myocardial Infarction; TIMI - Thrombolysis in myocardial infarction*

**eTable 2:** Risk of any complication with complete data on all predictors in SCAD-PCI patients (n=106)

|                                                  | Model 1 *          |       | Model 2 *          |       |
|--------------------------------------------------|--------------------|-------|--------------------|-------|
|                                                  | OR (95% CI)        | P     | OR (95% CI)        | P     |
| Age at first SCAD event, per year                | -                  |       | 1.05 (0.99; 1.11)  | 0.143 |
| Male vs Female                                   | -                  |       | 0.52 (0.06; 4.56)  | 0.559 |
| White European vs Not White European             | -                  |       | 1.03 (0.17; 6.17)  | 0.972 |
| AHA coronary segment involved                    |                    |       |                    |       |
| Mid vs proximal                                  | 0.83 (0.32; 2.14)  | 0.696 | 0.97 (0.29; 3.18)  | 0.955 |
| Distal vs proximal                               | 0.70 (0.22; 2.28)  | 0.550 | 1.64 (0.33; 8.02)  | 0.544 |
| Branch vs proximal                               | 0.61 (0.17; 2.24)  | 0.460 | 1.89 (0.34; 10.42) | 0.464 |
| More than one segment within the vessel involved | 2.38 (1.06; 5.34)  | 0.036 | 1.62 (0.54; 4.86)  | 0.392 |
| Classification based on appearance when imaged   |                    |       |                    |       |
| Type 2 vs Type 1                                 | 4.17 (1.03; 16.83) | 0.045 | 4.21 (0.88; 20.09) | 0.072 |
| Type 3 vs Type 1                                 | 1.41 (0.16; 12.13) | 0.753 | 1.99 (0.16; 24.46) | 0.590 |
| Type 4 vs Type 1                                 | 1.23 (0.23; 6.59)  | 0.813 | 1.92 (0.29; 12.95) | 0.502 |
| Maximum stent diameter, per cm                   | 2.62 (1.28; 5.39)  | 0.009 | 1.91 (0.75; 4.86)  | 0.177 |
| Total number of stents, per additional stent     | 1.90 (1.26; 2.85)  | 0.002 | 1.62 (1.03; 2.56)  | 0.036 |
| Proximal diameter, per cm                        | 1.93 (1.09; 3.42)  | 0.031 | 1.71 (0.84; 3.49)  | 0.142 |

*Model 1: adjusted for age, sex and ethnicity.*

*Model 2: also adjusted for variables significantly associated with the risk of any complication in Table 2 (AHA coronary segment involved, Classification based on appearance when imaged, maximum stent diameter, total number of stents, proximal diameter)*

*Intervention type was excluded as this cohort comprised individuals with stents due to the inclusion of maximum stent diameter and total number of stents*

*SCAD – Spontaneous coronary artery dissection*

**eTable 3:** Risk of serious complications with complete data on all predictors in SCAD-PCI patients

(n=140)

|                                                  | Model 1 *          |        | Model 2 *          |        |
|--------------------------------------------------|--------------------|--------|--------------------|--------|
|                                                  | OR (95% CI)        | P      | OR (95% CI)        | P      |
| Age at first SCAD event, per year                | -                  |        | 1.03 (0.97; 1.10)  | 0.415  |
| Male vs Female                                   | -                  |        | 0.53 (0.04; 6.75)  | 0.623  |
| White European vs Not White European             | -                  |        | 0.28 (0.05; 1.52)  | 0.140  |
| Left main stem vessel affected                   | 7.24 (1.56; 33.66) | 0.012  | 1.81 (0.29; 11.23) | 0.523  |
| More than one segment within the vessel involved | 2.35 (0.88; 6.30)  | 0.088  | 1.36 (0.44; 4.18)  | 0.7587 |
| Maximum stent diameter, per mm                   | 5.42 (2.29; 12.79) | <0.001 | 4.41 (1.69; 11.46) | 0.002  |
| Total number of stents, per additional stent     | 1.48 (1.04; 2.11)  | 0.029  | 0.77 (0.35; 1.73)  | 0.534  |
| Total length of stents, per mm                   | 1.02 (1.00; 1.03)  | 0.014  | 1.02 (0.99; 1.05)  | 0.315  |

*Model 1: adjusted for age, sex and ethnicity.*

*Model 2 also adjusted for variables significantly associated with the risk of any complication in Table 2*



**eFigure 1:** A) Modified Yip-Saw classification type by clinical management, B) AHA coronary segment lesion by clinical management (n=436)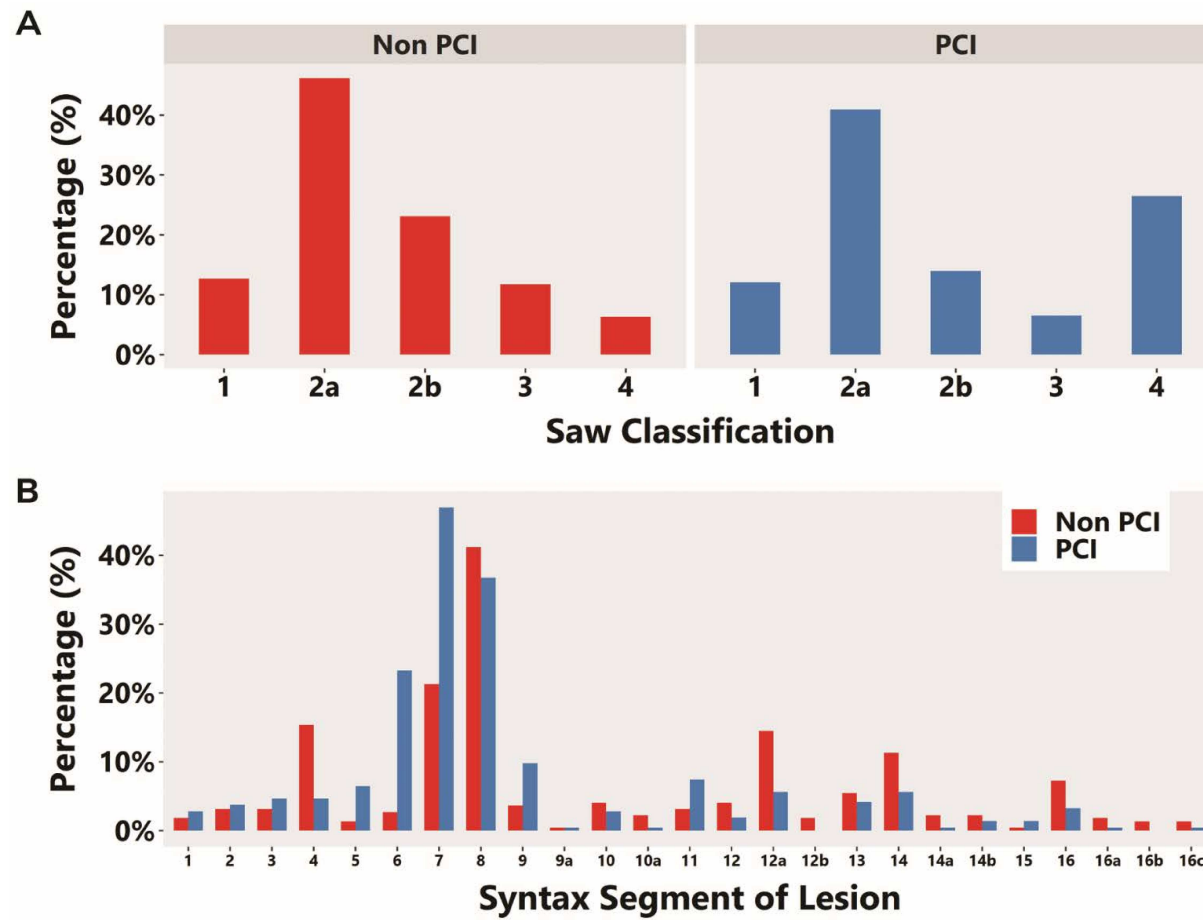

**Figure 2:** SCAD-PCI lesion characteristics as assessed by 3D-QCA (n=215), including A) length, B) area and diameter of stenoses, C) maximum lesion and vessel bending, D) displaced haematoma volume.

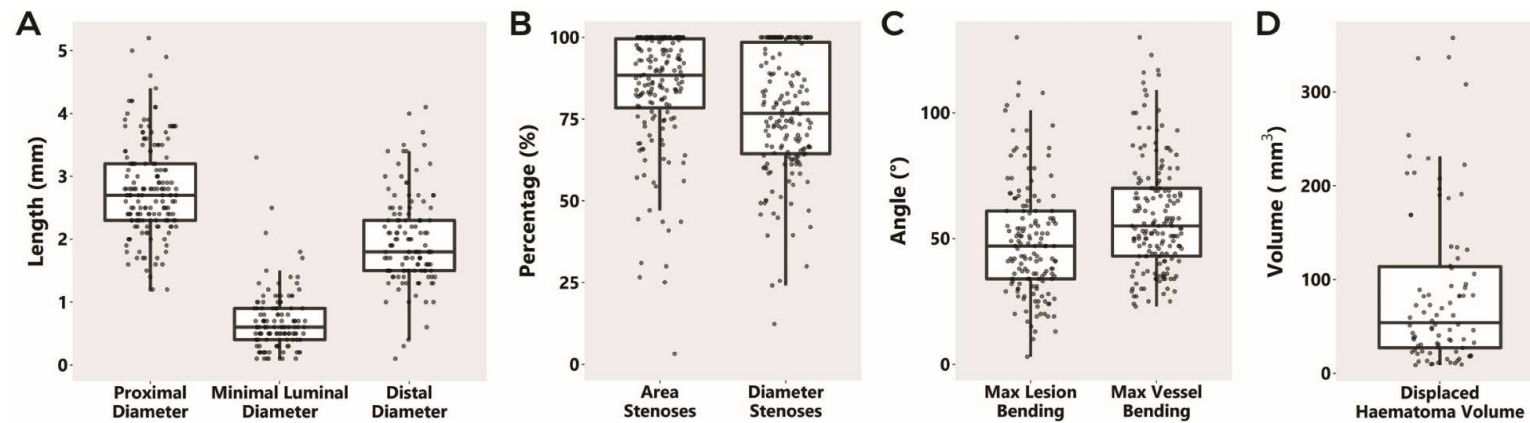

**eFigure 3:** Change in TIMI grade flow by initial TIMI value in a SCAD-PCI cohort (n=215)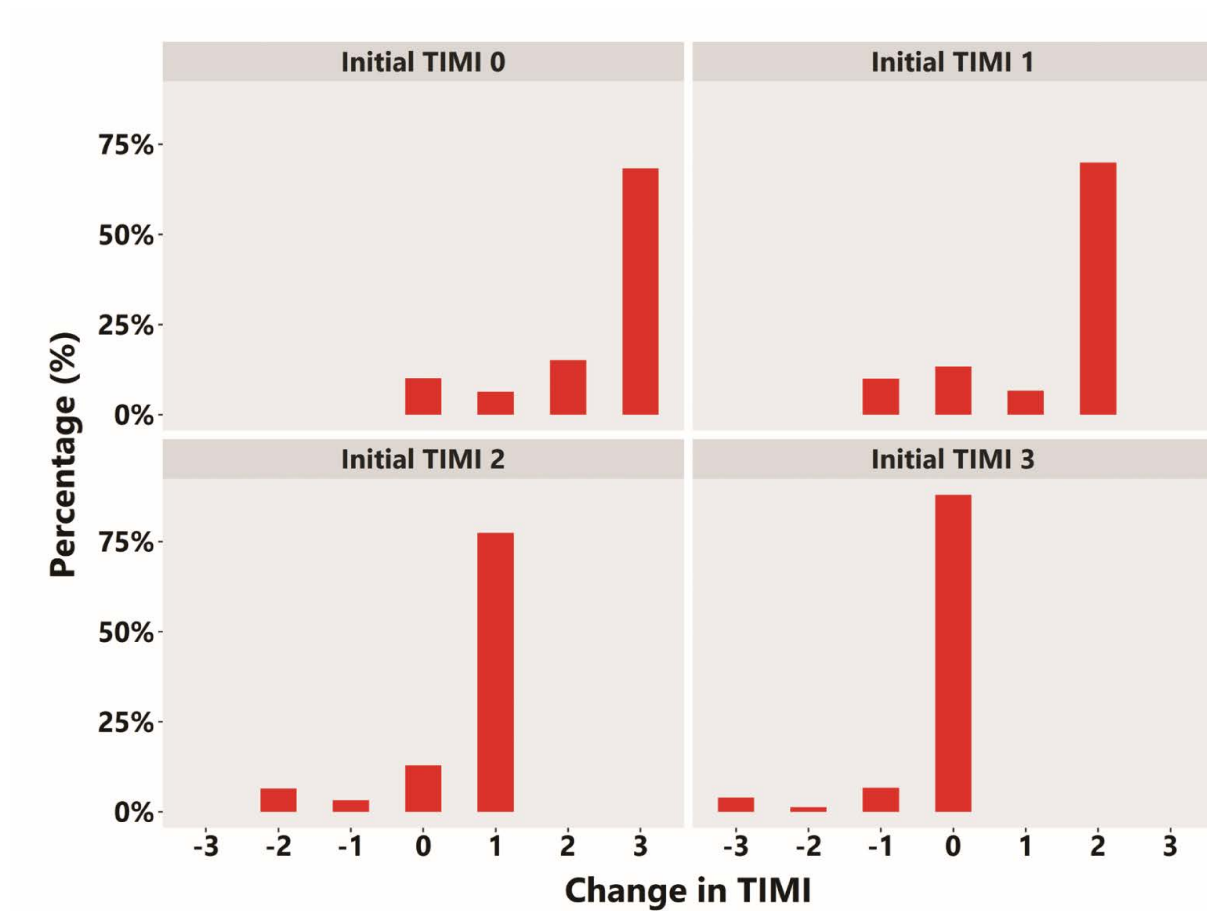

Initial TIMI 0 – n=79, Initial TIMI 1 – n=30, Initial TIMI 2 – n=31, Initial TIMI 3 – n=75

**eFigure 4:** A) Changes in Thrombolysis in myocardial infarction (TIMI) flow for STEMI subset of SCAD-PCI patients (n=119) and B) PCI complications in the STEMI subset of SCAD-PCI cohort (n=119)

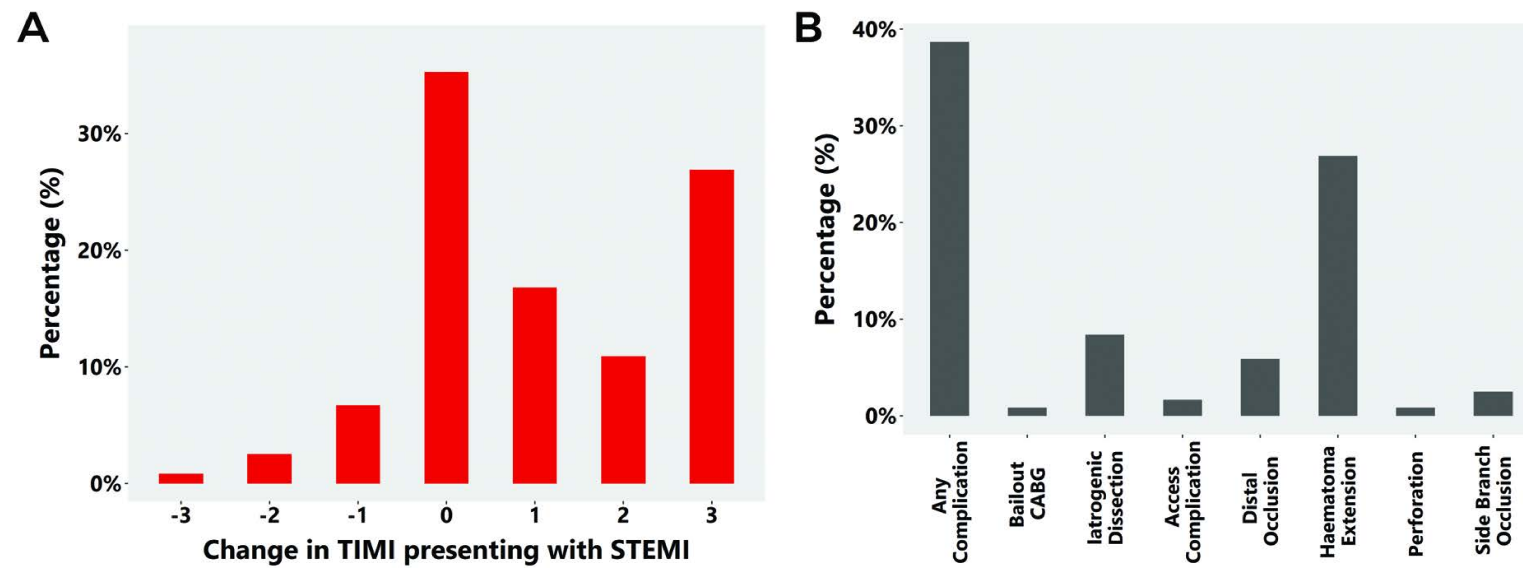

**eFigure 5:** Ejection fraction by clinical management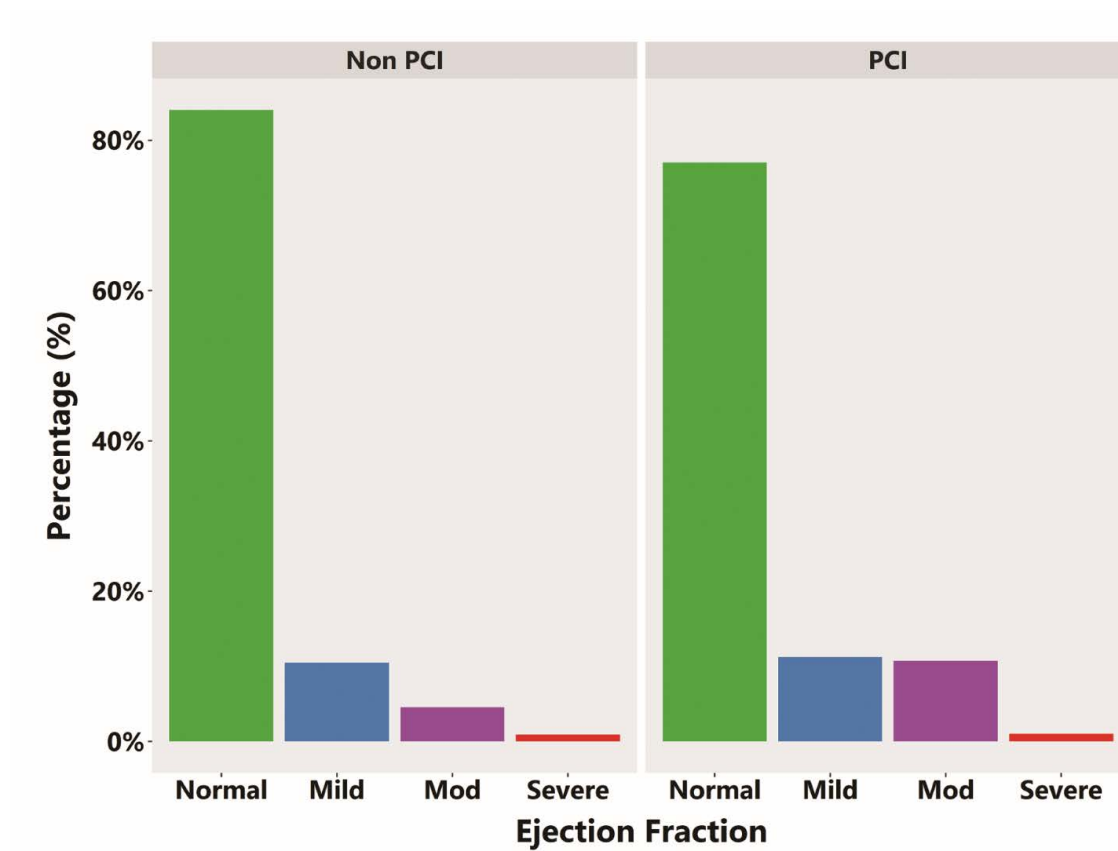

PCI: normal n=151, mild n=22, moderate n=21, severe n=2

Non-PCI: normal n=184, mild n=23, moderate n=10, severe n=2

**eFigure 6:** A) Kaplan-Meier plot of major adverse cardiovascular and cerebrovascular events (n=433), and B) recurrence (n=434) by intervention in a SCAD cohort

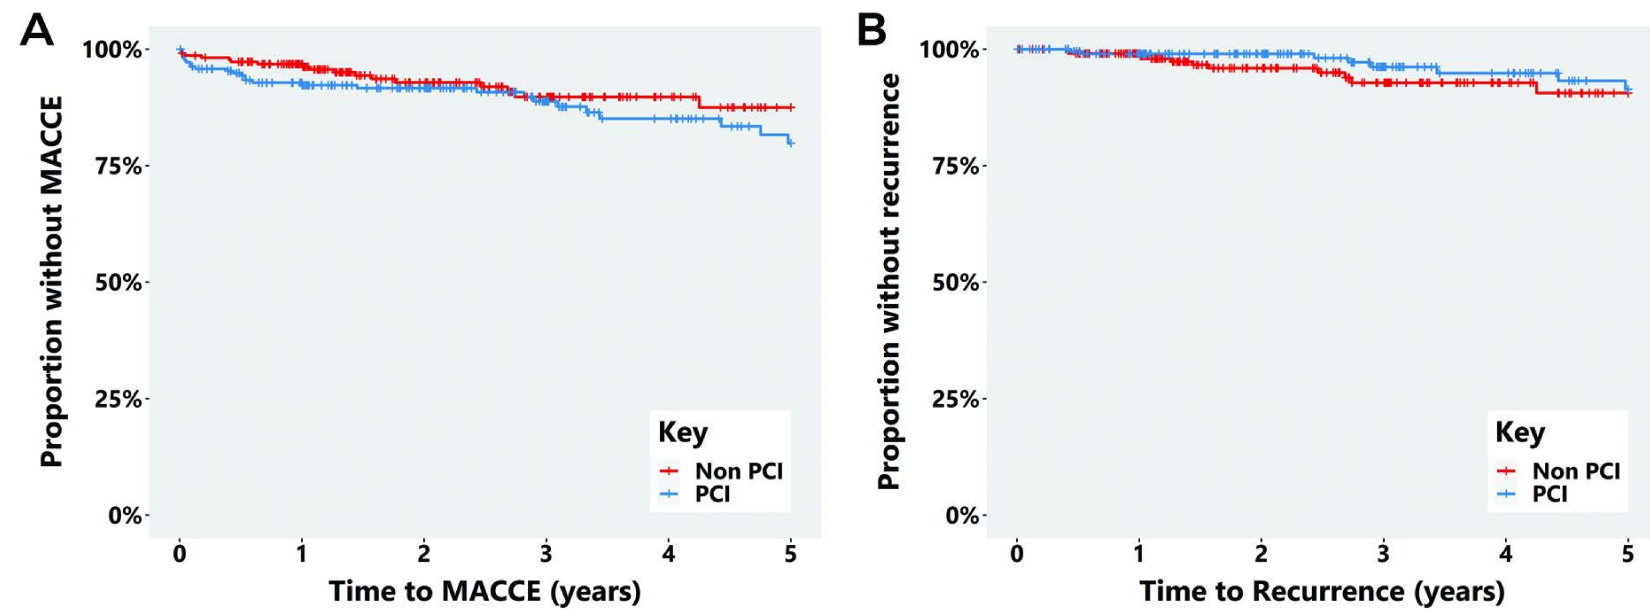

Proportional hazards model: MACCE  $p=0.3931$ , recurrence  $p=0.3087$ . Major Adverse Cardiovascular and Cerebrovascular Events (MACCE: death, stroke, myocardial infarction or revascularisation occurring at any point after discharge from the index SCAD event) and recurrence (a new angiographically confirmed SCAD occurring after discharge from the index episode and either anatomically or temporally separated from the first event). MACCE components - recurrent AMI (PCI 9.3%, 20/215, non-PCI 7.7%, 17/221); revascularisation (PCI 4.7%, non-PCI 1.4%); stroke (PCI 1.5%, non-PCI 0.7%); death (PCI 1.4%, non-PCI 0.5%)

**eTable 4:** Descriptive characteristics of the SCAD cohort, by national cohort

|                                              | Spain<br>(n=119)      | Netherlands<br>(n=39) | UK<br>(n=278) |
|----------------------------------------------|-----------------------|-----------------------|---------------|
| <b>Patient Characteristics</b>               |                       |                       |               |
| Total (n %)                                  | 119 27.3%             | 39 8.9%               | 278 63.8%     |
| Age at first SCAD event, years (median, IQR) | 52 (46-58)            | 50 (46-54)            | 46 (41-52)    |
| Ethnicity (n %)                              | White European        | >34 >87.2%            | 263 95.0%     |
|                                              | Not White European    | <5 <12.8%             | 14 5.1%       |
| Sex (n %)                                    | Female                | >34 >87.2%            | 261 93.9%     |
|                                              | Male                  | <5 <12.8%             | 17 6.1%       |
| Pregnancy status (n %)                       | Not pregnant (female) | >30 >85.7%            | 240 88.8%     |
|                                              | Pregnant (female)     | <5 <4.5%              | 21 5.6%       |
| Smoking (n %)                                | Never smoker          | 29 (74.4%)            | 185 (66.5%)   |
|                                              | Ex-smoker             | 15 (12.6%)            | 79 (28.4%)    |
|                                              | Current smoker        | 32 (26.9%)            | 14 (5.0%)     |
| Diabetes Mellitus (n %)                      | No                    | >114 (>95.8%)         | >273 (>98.2%) |
|                                              | Yes                   | <5 (<4.2%)            | <5 (<1.8%)    |
| Hypertension (n %)                           | No                    | 90 (75.6%)            | 215 (77.3%)   |
|                                              | Yes                   | 29 (24.4%)            | 63 (22.7%)    |
| Dyslipidaemia (n %)                          | No                    | 85 (71.4%)            | 254 (91.4%)   |
|                                              | Yes                   | 34 (28.6%)            | 24 (8.6%)     |
| <b>Clinical characteristics</b>              |                       |                       |               |
|                                              | NSTEMI                | >50 43.7%             | >20 56.4%     |

|                                                              |                |     |       |    |        |     |       |
|--------------------------------------------------------------|----------------|-----|-------|----|--------|-----|-------|
| Type of myocardial infarction (n %)                          | STEMI          | 65  | 54.6% | 14 | 35.9%  | 117 | 42.1% |
|                                                              | Cardiac arrest | <5  | 5.9%  | <5 | <12.8% | 30  | 10.8% |
| Left main stem vessel affected (n %)                         |                | <5  | <4.2% | <5 | <13.2% | 10  | 3.6%  |
| Left anterior descending artery affected (n %)               |                | 63  | 52.9% | 22 | 57.9%  | 182 | 65.5% |
| Left circumflex artery affected (n %)                        |                | 38  | 31.9% | 15 | 38.5%  | 78  | 28.1% |
| Right coronary artery affected (n %)                         |                | 19  | 16.0% | 11 | 28.2%  | 57  | 20.5% |
|                                                              | Proximal       | 23  | 19.3% | 6  | 15.4%  | 52  | 18.7% |
| AHA coronary segment involved (n %)                          | Mid            | 26  | 21.9% | 7  | 18.0%  | 97  | 34.9% |
|                                                              | Distal         | 27  | 22.7% | 15 | 38.5%  | 87  | 31.3% |
|                                                              | Branch         | 43  | 36.1% | 11 | 28.2%  | 42  | 15.1% |
| More than one vessel involved (n %)                          |                | 9   | 7.6%  | 10 | 26.3%  | 32  | 11.5% |
| More than one segment in the vessel involved (n %)           |                | 28  | 23.5% | 11 | 28.2%  | 104 | 37.4% |
| Tortuosity Index (median, IQR)                               |                | 3   | (0-5) | 4  | (3-6)  | 4   | (2-6) |
| Yip-Saw Classification based on appearance when imaged (n %) | Type 1         | 24  | 20.2% | <5 | <12.8% | 27  | 9.7%  |
|                                                              | Type 2         | 66  | 55.4% | 30 | 76.9%  | 175 | 62.9% |
|                                                              | Type 3         | 12  | 10.1% | <5 | <12.8% | 26  | 9.4%  |
|                                                              | Type 4         | 17  | 14.3% | <5 | <12.8% | 50  | 18.0% |
| Taking aspirin (n %)                                         |                | 110 | 93.2% | 39 | 100.0% | 266 | 97.1% |
| Taking DAPT (n %)                                            |                | 74  | 62.7% | 32 | 84.2%  | 248 | 91.2% |
| Taking Beta-blocker (n %)                                    |                | 94  | 79.7% | 26 | 66.7%  | 242 | 88.3% |
| Taking ACE inhibitors (n %)                                  |                | 58  | 49.2% | 28 | 71.8%  | 218 | 79.3% |
| Taking statins (n %)                                         |                | 96  | 81.4% | 25 | 64.1%  | 205 | 74.8% |
| <b>Intervention Details</b>                                  |                |     |       |    |        |     |       |
| Type of intervention (n %)                                   | Conservative   | 59  | 49.6% | 20 | 51.3%  | 142 | 51.1% |



|                             |                                                    |      |              |      |             |      |              |
|-----------------------------|----------------------------------------------------|------|--------------|------|-------------|------|--------------|
|                             | Stent                                              | 45   | 37.8%        | >10  | >25.6%      | 98   | 35.3%        |
|                             | Balloon                                            | >10  | <8.4%        | 5    | 12.8%       | 27   | 9.7%         |
|                             | Wiring                                             | <5   | <4.2%        | <5   | <12.8%      | 11   | 4.0%         |
|                             | Maximum stent diameter, mm (median, IQR)           | 3    | (2.5-3.5)    | 3    | (2.5-3.0)   | 3    | (2.5-3.5)    |
|                             | Total number of stents (median, IQR)               | 2    | (1-2)        | 2    | (1-3)       | 2    | (1-3)        |
|                             | Total length of stents, cm (median, IQR)           | 38   | (25-52)      | 37   | (26-56)     | 51   | (32.5-68)    |
|                             | Proximal diameter, mm (median, IQR)                | 2.4  | (1.95-2.70)  | 2.6  | (2.28-3.13) | 2.6  | (2.20-3.10)  |
|                             | Length of lesion, mm (median, IQR)                 | 32.9 | (24.2-48.0)  | 39.7 | (30.0-50.2) | 38.8 | (26.6-61.3)  |
|                             | Volume of haematoma, mm <sup>3</sup> (median, IQR) | 42.2 | (24.2-115.3) | 59.6 | (22.3-95.2) | 61.9 | (36.0-102.7) |
|                             | 0 (No flow)                                        | <5   | <8.3%        | 0    | 0.0%        | 12   | 8.8%         |
| Final TIMI grade flow (n %) | 1                                                  | <5   | <8.3%        | <5   | <26.3       | 7    | 5.2%         |
|                             | 2                                                  | 8    | 13.3%        | <5   | <26.3       | 12   | 8.8%         |
|                             | 3 (Good flow)                                      | 46   | 76.7%        | 14   | 73.7%       | 105  | 77.2%        |
| <b>Outcomes</b>             |                                                    |      |              |      |             |      |              |
|                             | Any complication (n %)                             | 24   | 40.0%        | 6    | 30.0%       | 57   | 41.0%        |
|                             | Serious complication (n %)                         | 10   | 16.7%        | <5   | <26.3%      | 15   | 11.0%        |
|                             | Time to MACCE (median, IQR)                        | 1.10 | (0.92-2.07)  | 1.79 | (1.18-2.89) | 3.01 | (1.47-4.79)  |
|                             | MACCE (n %)                                        | 10   | 8.4%         | 5    | 12.8%       | 38   | 13.7%        |
|                             | Time to Recurrence (median, IQR)                   | 1.11 | (0.97-2.04)  | 1.96 | (1.19-2.95) | 3.09 | (1.76-5.00)  |
|                             | Recurrence (n %)                                   | 5    | 4.3%         | <5   | <12.8%      | 21   | 7.6%         |

Cells with small counts of less than five have been replaced with "<5" to reduce the risk of identifying individuals from the data.
